# Supplementary material
Source: PubMed Central journal article supplement (PMC6309656)
Supplement: NIHMS1508088-supplement-1.pdf [file NIHMS1508088-supplement-1.pdf]

**Supplemental Material**

**Supplemental Information for:** Chronic inflammation promotes skin carcinogenesis in cancer-prone discoid lupus erythematosus.

## Supplemental Methods

### ***Animal carcinogenesis studies***

In order to test the development of cancer in the context of chronic inflammation associated with discoid lupus, we designed a skin carcinogenesis protocol (Fig. 2A). On the first day, four-eight-week old female MRL/*lpr* and MRL/*n* control mice were shaved on their back and treated with 50 µg 7,12-Dimethylbenzanthracene (DMBA). After a week, all mice were treated twice with 6 µg 12-O-Tetradecanoylphorbol-13-acetate (TPA) for one week and started to receive UV radiation twice a week for 16 weeks. UV dose was titrated up to 300 mJ/cm<sup>2</sup> in order to induce and maintain skin rash in the test group. Skin rash and tumor development were monitored and recorded weekly over the duration of the study.

### ***Tacrolimus treatment protocol***

In order to test the effect of systemic immunosuppressive medications on cancer development in the context of lupus-associated inflammation, we employed a skin carcinogenesis protocol described above (Fig. 5A). Briefly, on the first day, four eight-week old female MRL/*lpr* and MRL/*n* control mice were shaved on their back and treated with 50 µg DMBA. The following week, all mice received two doses of 6 µg TPA in one week and started to receive UV radiation (300 mJ/cm<sup>2</sup>) twice a week together with intraperitoneal injections of (1mg/kg) of tacrolimus three times per week for 9 weeks. The skin rash and tumor progression was monitored during the course of the experiment.

### ***Flow cytometry***

Lymph nodes and back skin of MRL/*lpr* and MRL/*n* control mice were harvested and analyzed using flow cytometry. Lymph nodes were obtained and incubated in collagenase IV (Worthington Biochemical, Lakewood, NJ)-containing digestion buffer for one hour at 37°C. Single cell suspension was obtained by first homogenizing and then filtering the cell suspension

through a 70µm cell strainer. Back skin was harvested and homogenized using the same method. Before staining the cells with fluorochrome-conjugated antibodies, all cells were treated with 2.4G2 supernatant to block Fc receptors. Cells were stained with the following monoclonal surface antibodies: CD3e (145-2C11, eBioscience, San Diego, CA), CD4 (RM4-5, eBioscience), CD8α (53-6.7, eBioscience), CD44 (IM7, eBioscience), and PD-1 (J43, eBioscience). Intracellular stains were performed after fixation and permeabilization with Foxp3/Transcription Factor Staining Buffer Set (eBioscience). Subsequently, all cells were stained with the following antibodies: GATA-3 (TWAJ, eBioscience), Foxp3 (FJK-16s, eBioscience) and T-bet (eBio4B10, eBioscience). Cells were assayed on a FACS Canto flow cytometer (BD Bioscience) and data were analyzed using FlowJo software (Tree Star, Ashland, OR).

### ***Histology, immunohistochemistry and immunofluorescence***

Dorsal skin samples were harvested from MRL/*lpr* and MRL/*n* control mice and fixed in 4% paraformaldehyde (PFA) overnight at 4 °C. Subsequently, tissues were dehydrated in ethanol, processed and embedded in paraffin according to standard histology processes. The paraffin-embedded tissues were sectioned at 5 µm, deparaffinized and stained with hematoxylin and eosin (H&E) and toluidine blue (Sigma-Aldrich, St. Louis, MO) to detect mast cells. Masson's trichrome stains (Sigma-Aldrich) were used to stain for scarring according to the manufacturer's protocol. Where indicated, chromogenic staining was performed on tissue sections using Ventana Discovery Ultra staining platform, primary and secondary antibodies are listed in Supplementary Table S1A.

For immunofluorescent staining, the paraffin-embedded tissues were sectioned at 5µm. After deparaffinization, sections were permeabilized in PBS 0.2% Triton X-100 (Thermo Fisher Scientific Inc, Waltham, MA) and antigen retrieval was performed in Vector Lab Antigen Retrieval Solution (Vector Laboratories, Burlingame, CA) by heating the sections for 20 minutes at 95 °C. Nonspecific protein binding was blocked with 5% goat serum (Sigma-Aldrich, St.

Louis, MO) in 5% BSA-PBS before incubation with the anti-mouse antibodies listed in Supplementary Table S1A. DAPI (Thermo Fisher Scientific Inc) nuclear stain was used as counterstain. Histology images were taken using a fluorescence microscope (Zeiss Axio Scan, Oberkochen, Germany).

### **Quantitative RT-PCR**

Dorsal skin samples of MRL//*pr* and MRL//*n* control mice were harvested, homogenized and lysed in RLT Lysis Solution by making use of a Mini-BeadBeater-8 (BioSpec Products, Inc., Bartlesville, OK). MRL//*pr* skin was divided into rash and no rash portions. Total RNA from homogenized tissue was isolated using an RNeasy Mini Kit (Qiagen, Netherlands, Venlo, Limburg) and subsequently quantified using a NanoDrop ND-1100 (NanoDrop Technologies). cDNA samples were prepared by using 1µg of total RNA with Invitrogen SuperScript II Reverse Transcriptase (Life Technologies, Carlsbad, CA). Transcription levels of all cDNA samples were assessed by running the samples on a LightCycler<sup>®</sup> 480 System (Roche Molecular Systems Inc, Pleasanton, CA) with iTaq<sup>™</sup> Universal SYBR<sup>®</sup> Green Supermix (Bio-Rad Laboratories, Hercules, CA) or TaqMan Universal Master Mix II 4440040 (Applied Biosystems). Primer sequences for SYBR green and Taqman analysis are listed in Supplementary Table S1B. Quantitative real-time PCR for SYBR green analyses were performed in a final reaction volume of 10µL consisting of 2µL cDNA of the respective sample and 8µL of SYBR green master mix mixed with the corresponding primers (2µM) for each gene. TaqMan analysis was performed in a final reaction of 10µL consisting of 4.5µL cDNA of the respective sample and 5.5µL of TaqMan master mix mixed with the corresponding primers (20µM) for each gene. All reactions were performed in triplicate and transcription levels were normalized to *GAPDH* levels.

### **Protein analysis**



Skin tissue lysates of MRL/*lpr* and MRL/*n* control mice were collected. For MRL/*lpr* mice, skin was divided into rash and no rash portions. Subsequently, IL-4, IL-6, IL-10, IL-17a, TNF $\alpha$ , TGF- $\beta$ 1 and IFN $\gamma$  levels were determined using Elisa and BioLegend LEGENDplex™ kits according to the manufacturer's instructions (BioLegend, San Diego, CA).

Supplementary Figures

DLE-associated SCC

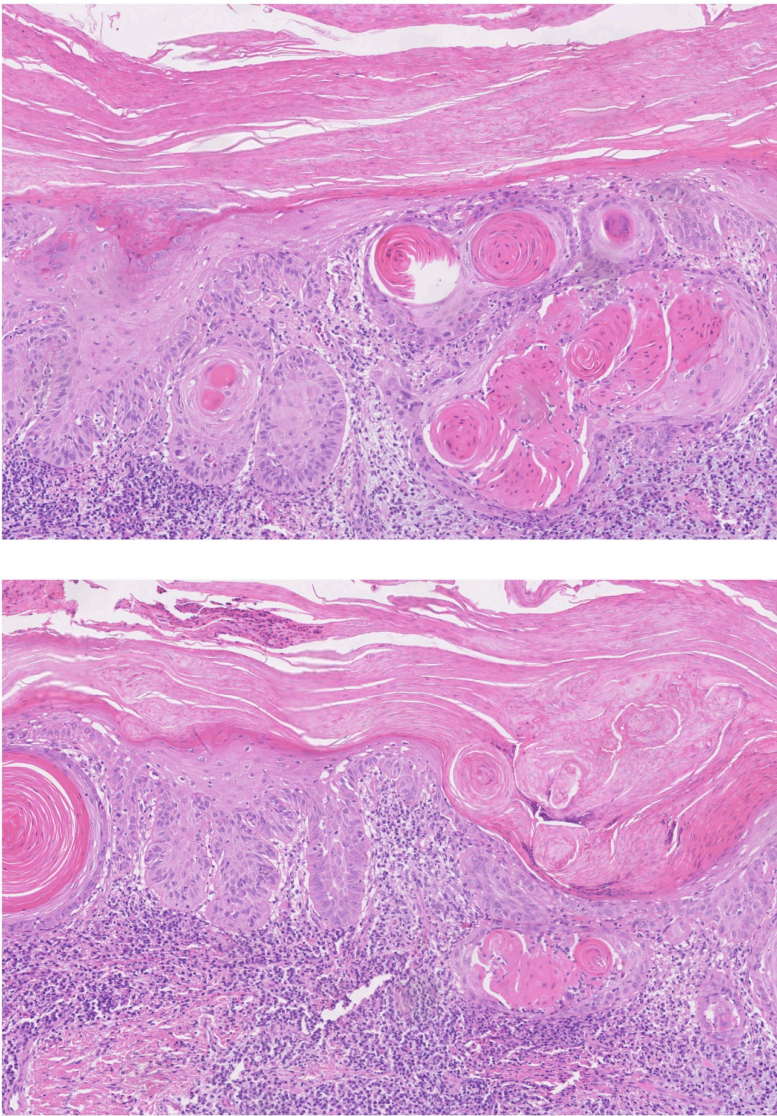

**Figure S1. Squamous cell carcinoma in the cancer-prone DLE plaque.** H&E images of superficially invasive SCC are shown; scale bars: 100  $\mu$ m.

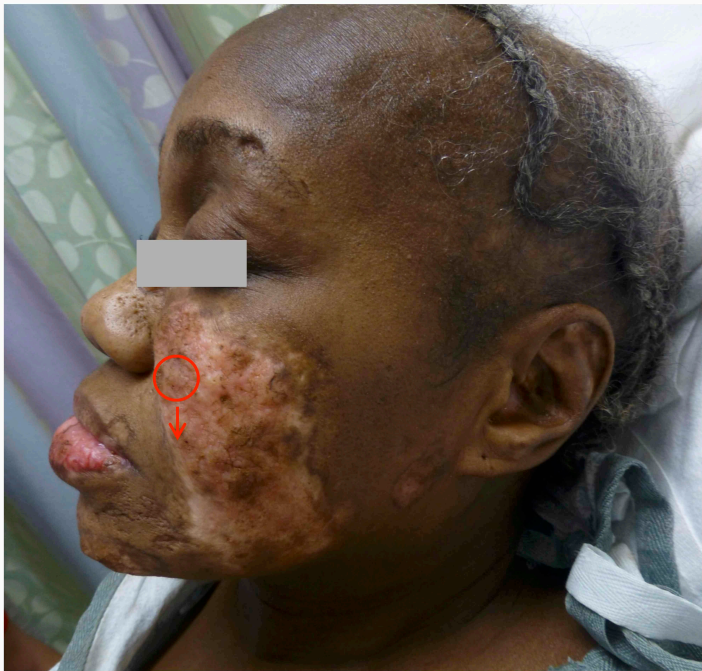

**Figure S2. Second clinical case of DLE-associated skin cancer.** 55-year-old African American patient developed a biopsy-confirmed cancerous lesion (red circle) at the margin of a depigmented DLE plaque on her left cheek. H&E, Masson's trichrome for scar detection and CD45 (pan-leukocyte marker) stains of the skin cancer are shown; scale bars: 100  $\mu$ m.

H&E-stained skin biopsy

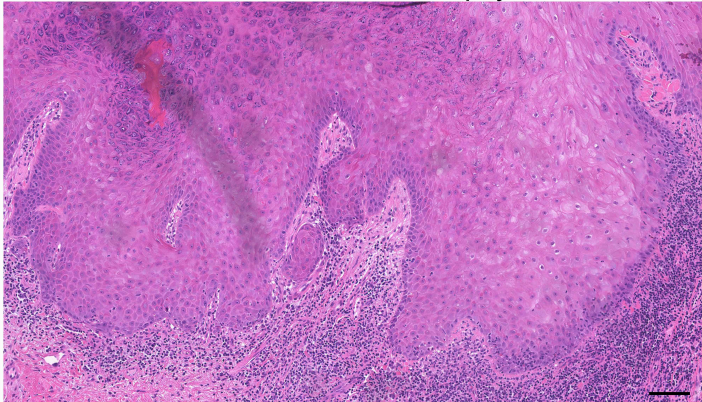

Masson's trichrome

CD45

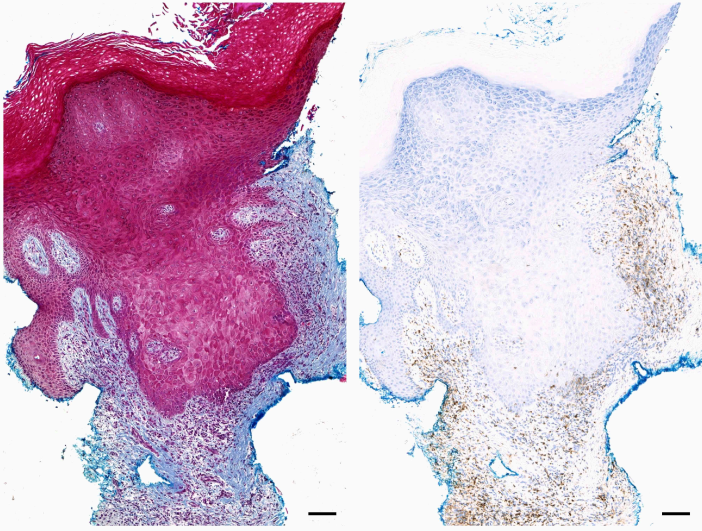



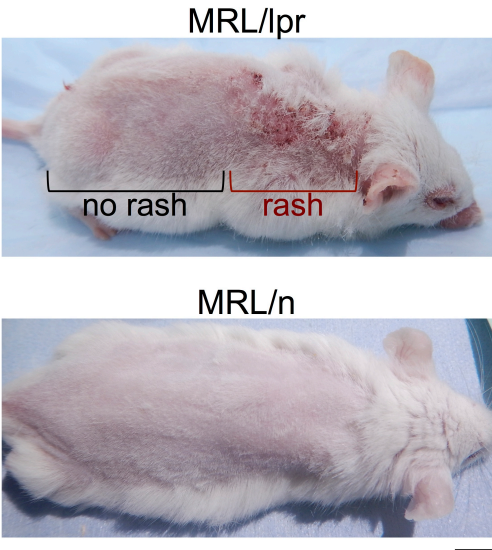

**Figure S3. Areas of skin rash and no rash in MRL/lpr mice.** Representative images of MRL/lpr and MRL/n mice that are treated with skin carcinogenesis protocol (Fig. 2A) are shown; scale bar: 1 cm.

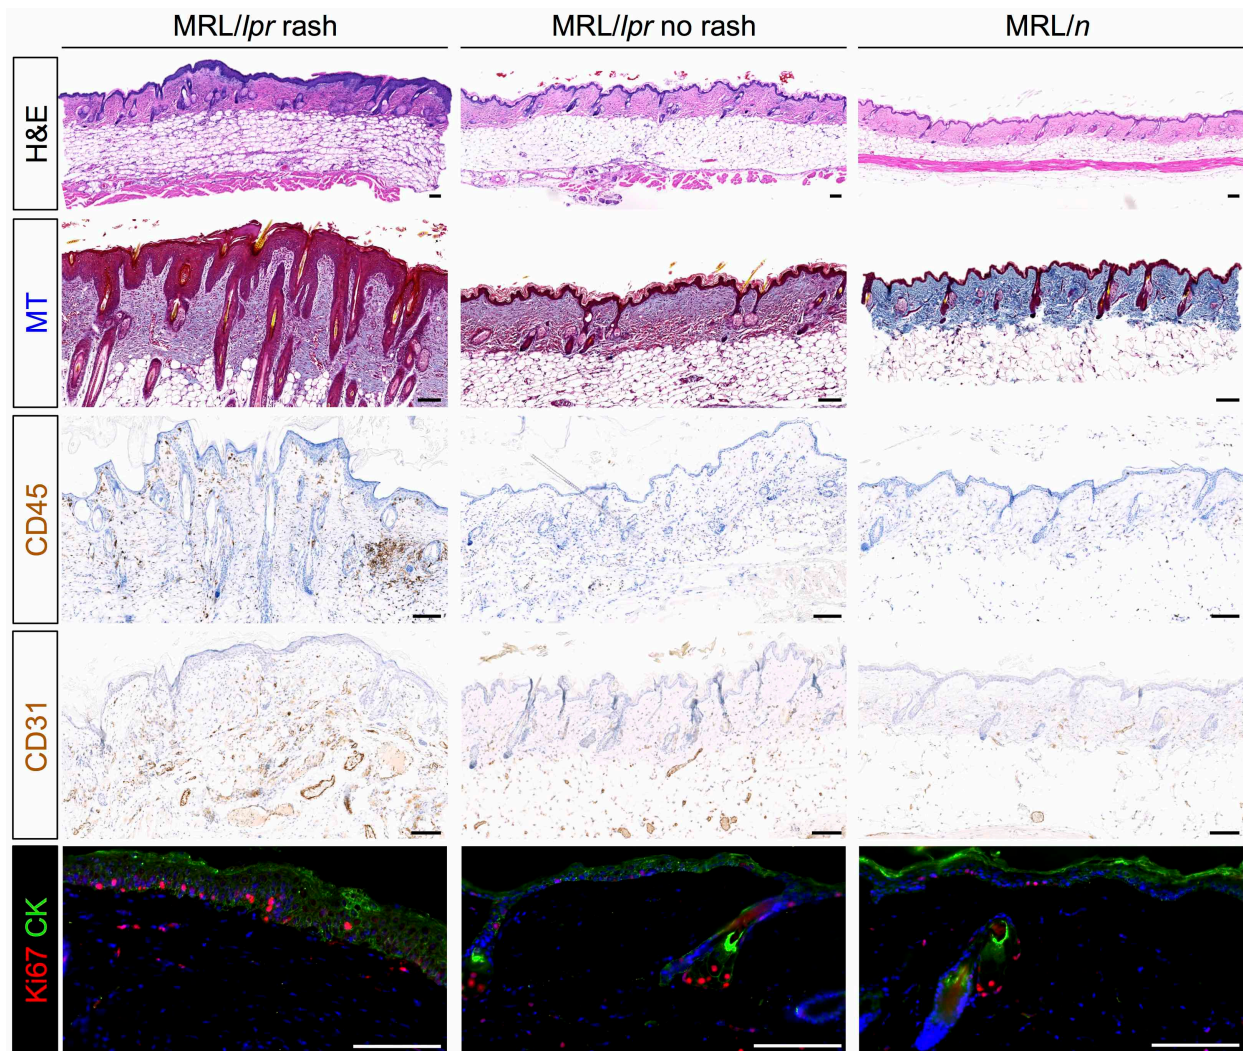

**Figure S4. MRL/*lpr* skin rash is marked by accumulation of leukocytes, expansion of blood vessels and epidermal hyperplasia without scarring.** Representative images of H&E, Masson's trichrome (MT), CD45 (pan-leukocyte marker), CD31 (endothelial marker) and Ki67/cytokeratin (CK)-stained skin sections of MRL/*lpr* (rash and no rash) and MRL/*n* are shown. Note the dense leukocyte infiltrate in the dermis accompanied by increased keratinocyte proliferation and epidermal thickening in MRL/*lpr* skin rash; scale bars: 100  $\mu$ m.

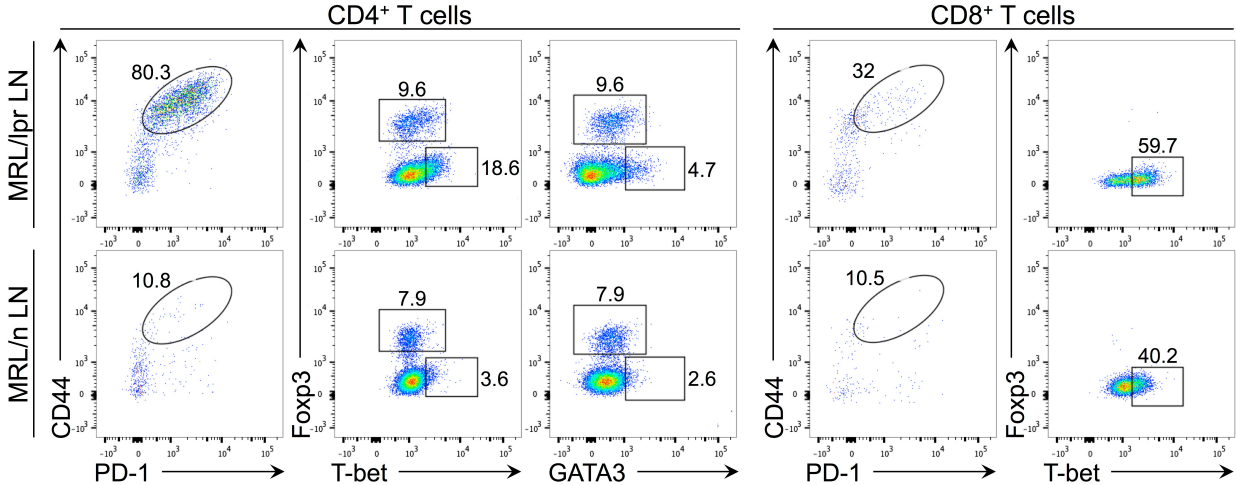

**Figure S5. Degree of T cell activation and its subtypes in the lymph nodes of lupus-prone mice.** Representative flow analysis of MRL/*lpr* and MRL/*n* lymph nodes demonstrates the percentage of CD44<sup>+</sup> PD1<sup>+</sup> activated CD4<sup>+</sup> and CD8<sup>+</sup> T cells, Foxp3<sup>+</sup> Tregs, T-bet<sup>+</sup> Th1 and GATA3<sup>+</sup> Th2 cells.



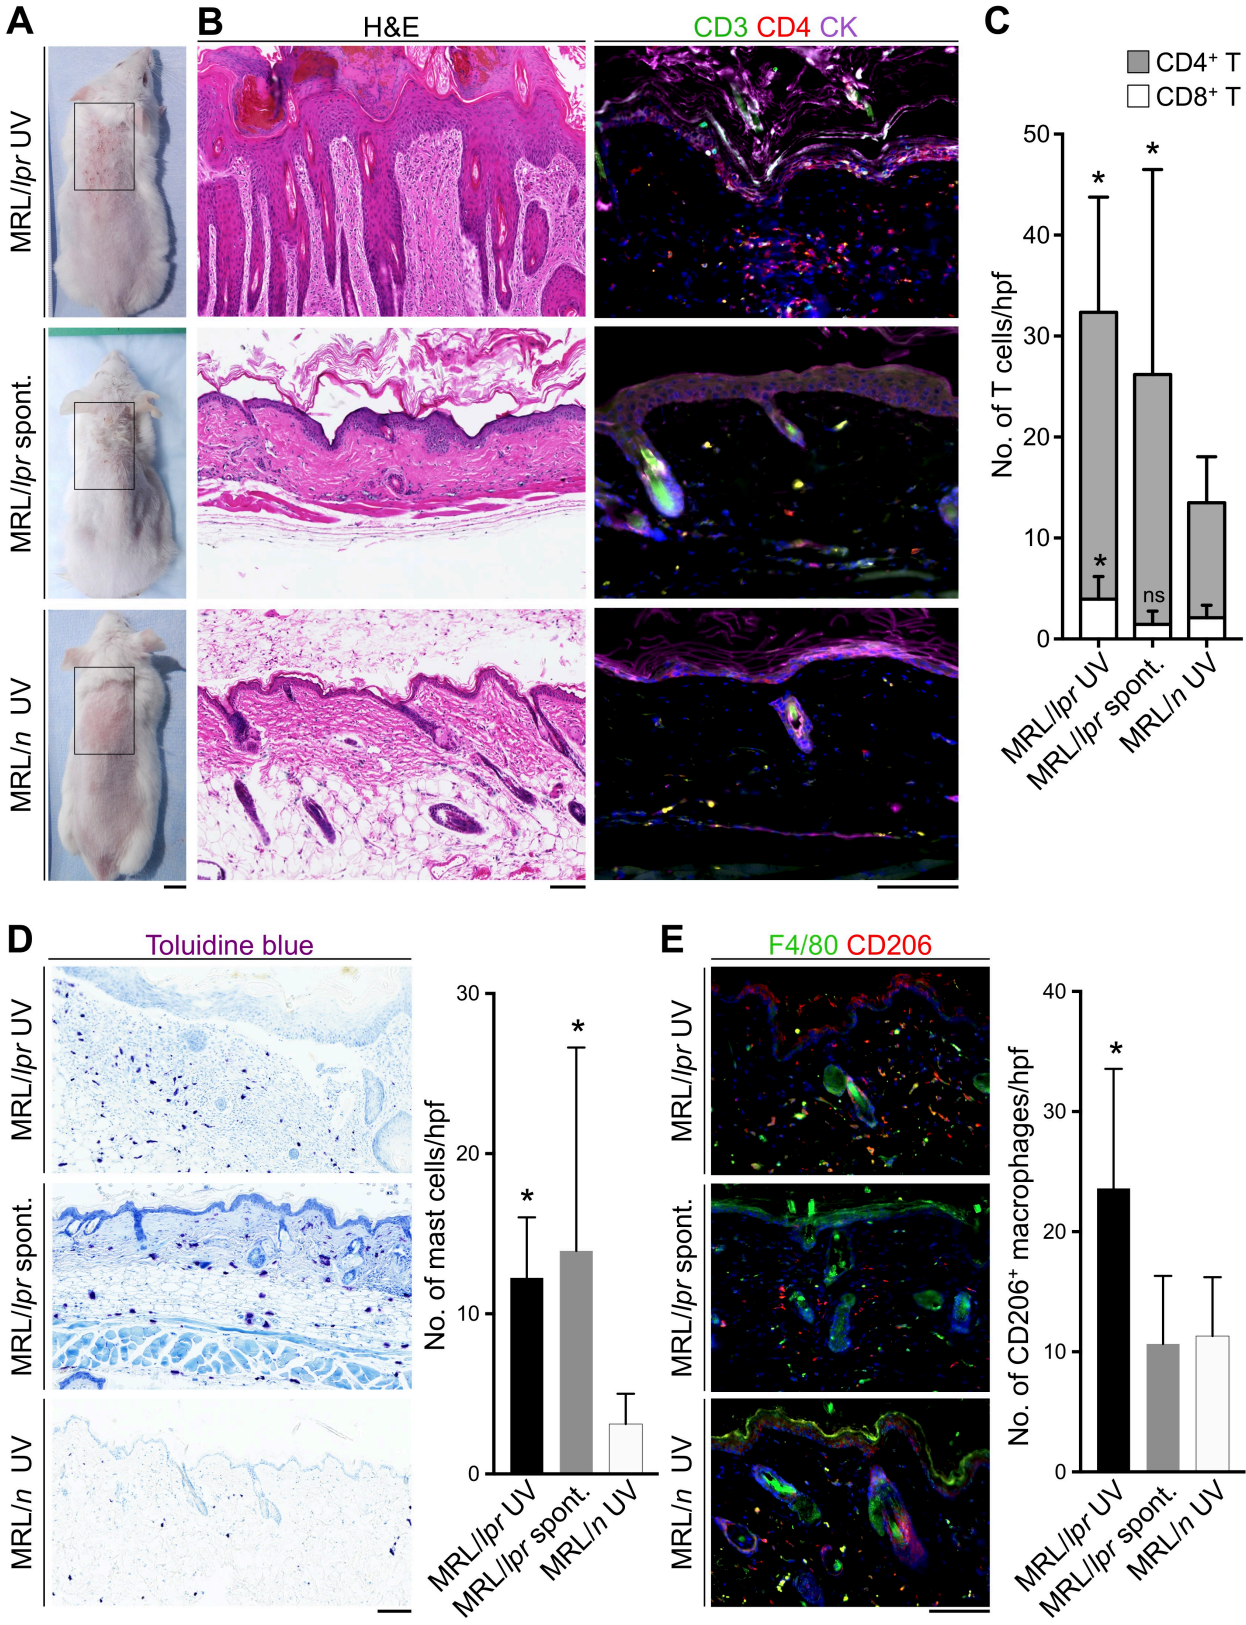

**Figure S6. Immune environment of spontaneous and UV-induced cutaneous lupus in MRL/lpr mice.** (A) Representative images of UV-treated MRL/lpr and MRL/n control mice (age: 4 months) and MRL/lpr mouse with spontaneous rash (spont.; age: 7 months) are shown. Boxes highlight the skin regions used for histological analysis. (B) Representative H&E and immunostaining images of the skin demonstrate the degree of epidermal hyperplasia, skin inflammation and CD4<sup>+</sup> T cell infiltrate in UV-treated and spontaneous MRL/lpr rash and MRL/n skin (CK: cytokeratin). (C) T cell infiltrates in UV-treated and spontaneous MRL/lpr rash and MRL/n control skin are quantified by counting the number of cells in 10 random high power fields (hpf) per skin section and averaging the counts across the animals in each group. (D) Mast cells are shown in representative images of toluidine blue-stained UV-treated and spontaneous MRL/lpr rash and MRL/n control skin and quantified in 10 random hpf per skin section across the animals in each group. (E) Representative images show CD206<sup>+</sup> F4/80<sup>+</sup> M2 macrophages in UV-treated and spontaneous MRL/lpr rash and MRL/n control skin and the bar graph demonstrates the average number of macrophages in 10 random hpf per skin section across the animals in the study groups. n = 3 per group; stained cells were counted blindly; \**p* < 0.05; compared to UV-treated MRL/n control skin by Student's *t* test; scale bars: 100 μm.



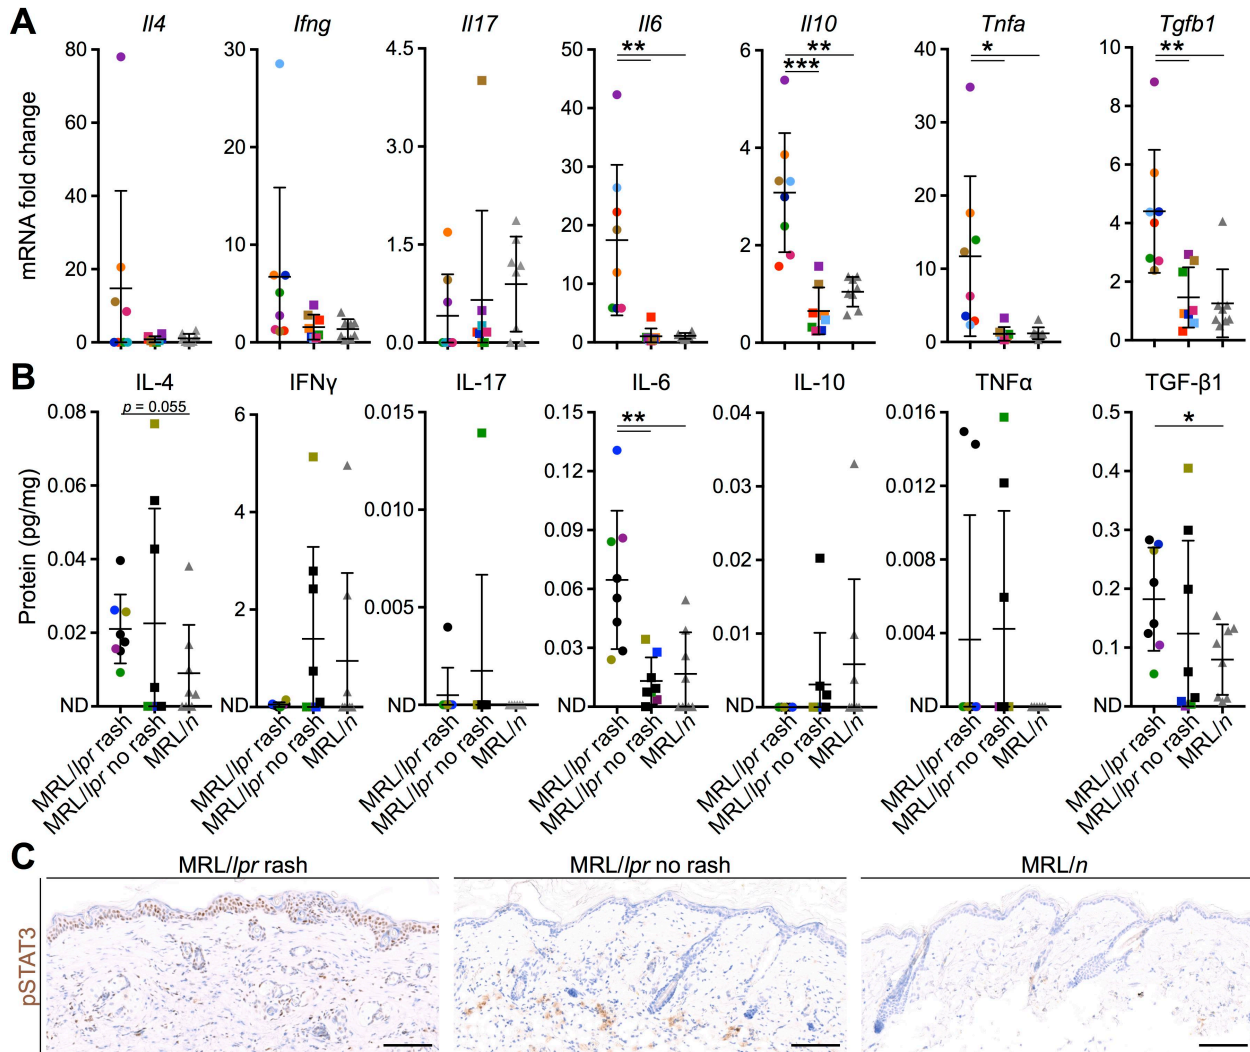

**Figure S7. Pro-tumorigenic cytokines are upregulated in MRL/lpr skin rash.** (A, B) Gene expression (A) and protein levels (B) of cytokines associated with T helper polarization and pro-inflammatory cytokines are measured in MRL/lpr rash, no rash and MRL/n skin. Note IL-4 protein level shows a trend towards upregulation in MRL/lpr rash ( $p = 0.055$ ). Color-coded points highlight the rash and no rash skin samples from the same MRL/lpr mouse (ND: not detectable). (C) pSTAT3 nuclear stain in representative images demonstrate the degree of IL-6 signaling onto keratinocytes in MRL/lpr rash, no rash and MRL/n control skin.  $n = 8$  per group; \* $p < 0.05$ ; \*\* $p < 0.01$ ; \*\*\* $p < 0.001$  by Student's  $t$  test; scale bars: 100  $\mu$ m.

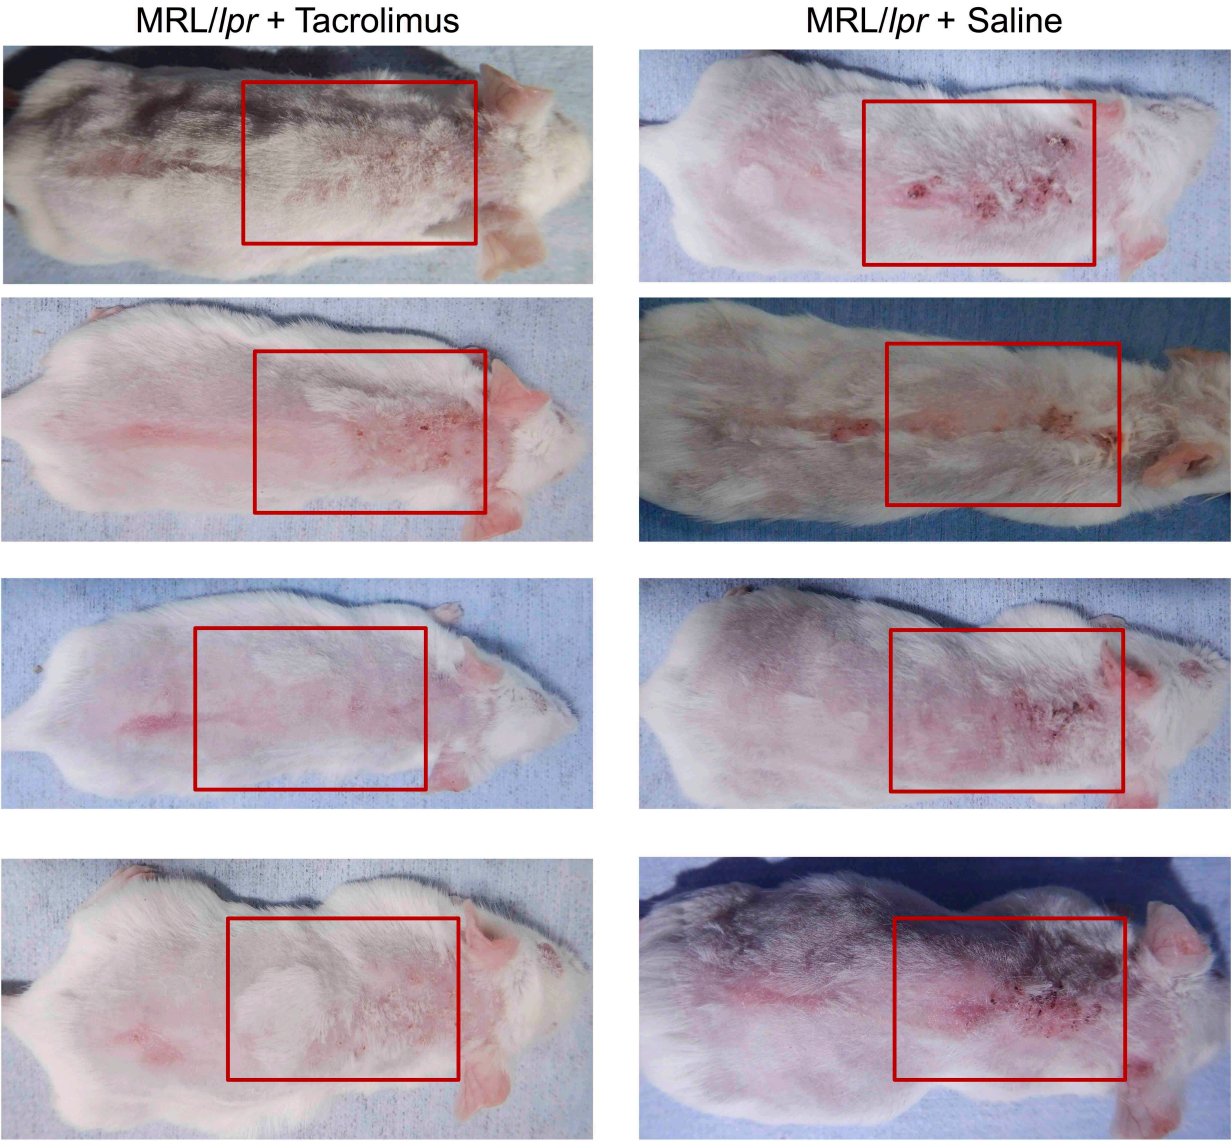

**Figure S8. Tacrolimus treatment suppresses cutaneous lupus inflammation in MRL/lpr mice.** Images of MRL/lpr mice treated with tacrolimus and MRL/lpr mice treated with saline during skin carcinogenesis protocol are shown. Red boxes highlight the skin areas that are prone to cutaneous lupus rash development in MRL/lpr mice (scale bar: 1cm).

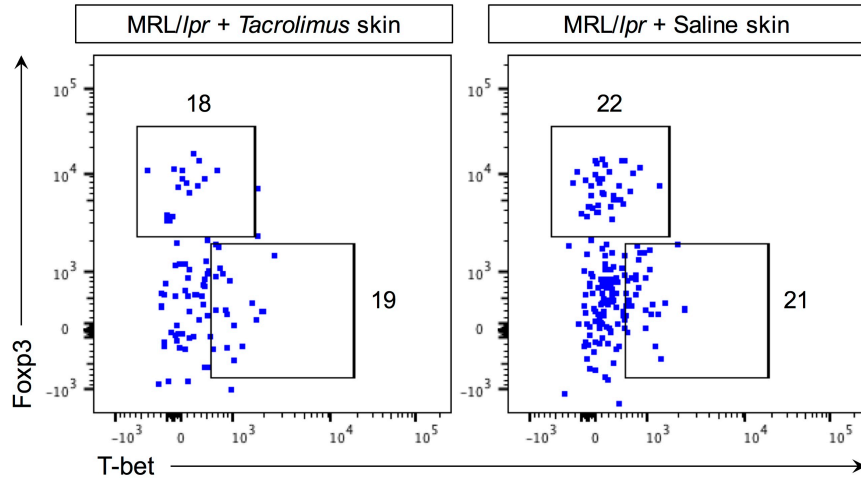

**Figure S9. Treg cells are reduced in the skin of MRL/lpr mice treated with tacrolimus.** Representative flow analysis and the average percentage of Foxp3<sup>+</sup> (Treg) and T-bet<sup>+</sup> (Th1) of CD4<sup>+</sup> T cells isolated from the upper back skin of MRL/lpr mice treated with tacrolimus or saline (control) are shown.



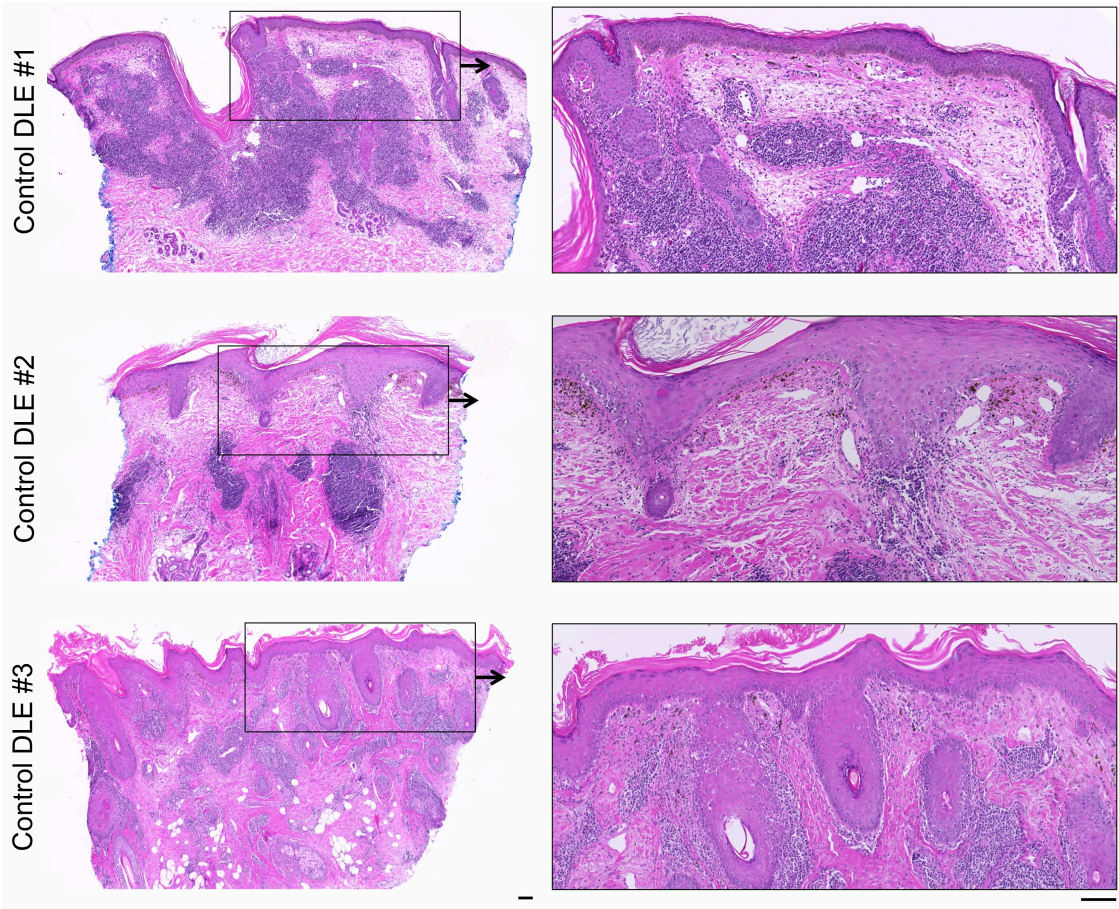

**Figure S10. DLE lesion biopsies from three African American patients with no history of skin cancer. H&E of the punch biopsy specimen are shown; scale bars: 100  $\mu$ m.**



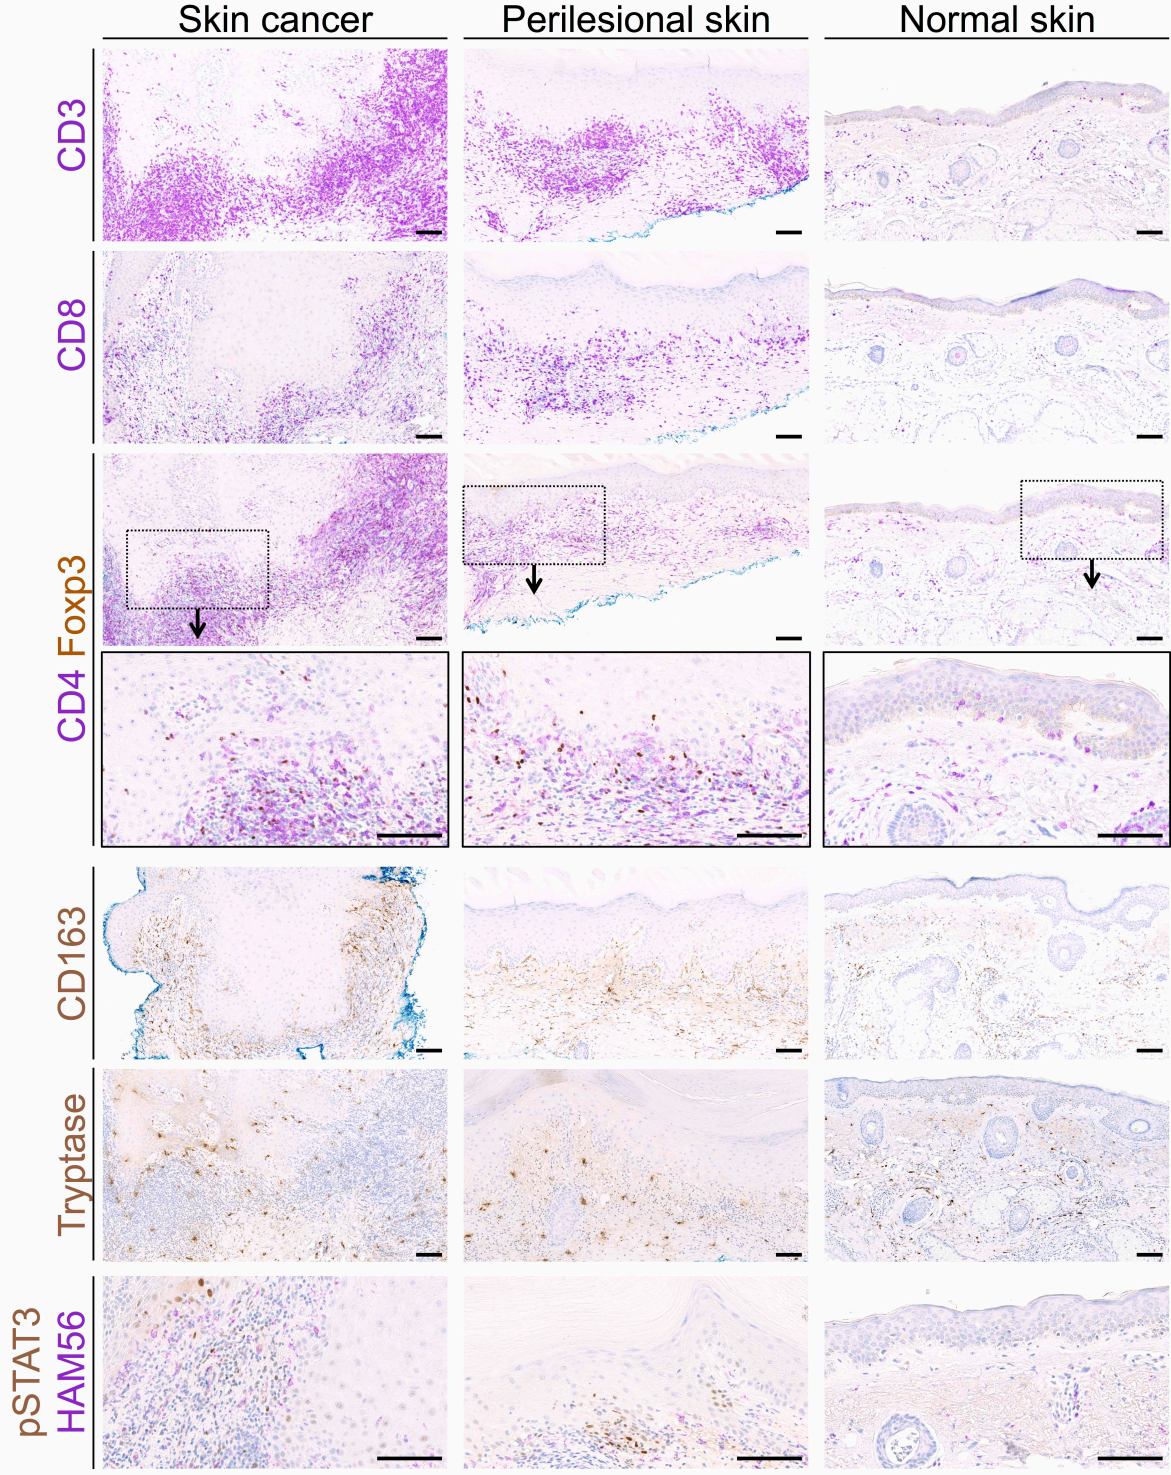

**Figure S11. Tumor-promoting immune milieu around the skin cancer site in second DLE patient.** Immunostaining demonstrates the accumulation of T cells including Foxp3<sup>+</sup> Tregs,

CD163<sup>+</sup> M2 macrophages and tryptase<sup>+</sup> mast cells in DLE-associated skin cancer and the perilesional skin compared to age-matched normal facial skin. pSTAT3 staining shows the keratinocyte with activated STAT3 signaling. HAM56 stains the dermal macrophages; scale bars: 100  $\mu$ m.

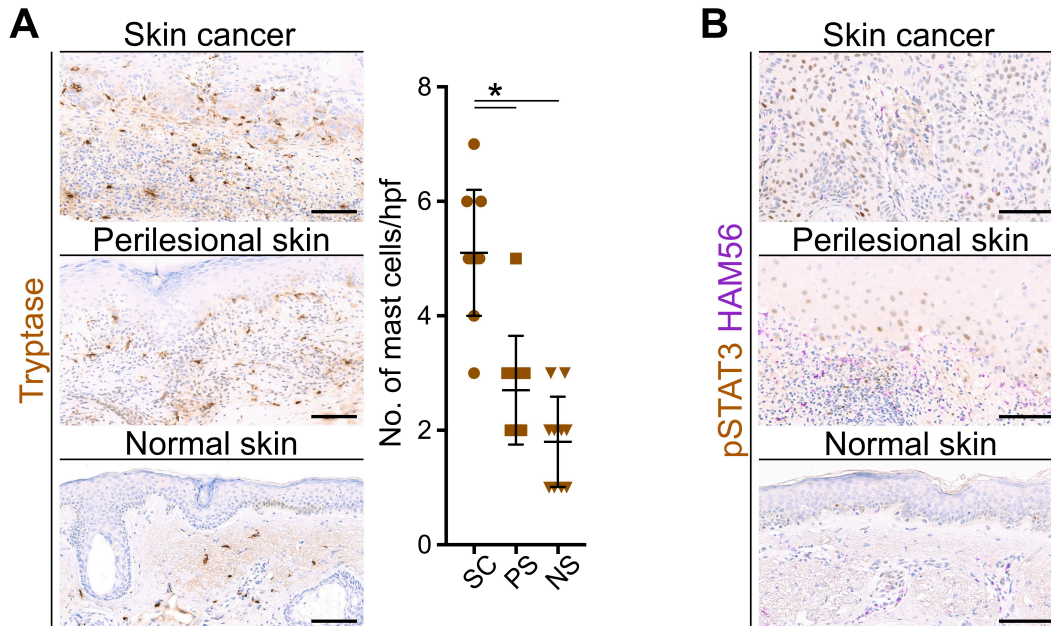

**Figure S12. Cancer-prone DLE plaque is marked by mast cell infiltrate surrounding the sites of skin cancer development and STAT3 signaling in the perilesional skin. (A)** Tryptase-positive mast cells are stained and quantified in the skin cancer, perilesional skin of DLE and normal skin. Representative images and cell quantification in 10 random hpf views are shown. **(B)** pSTAT3 staining highlights STAT3 signaling activity in the keratinocytes of the skin cancer, perilesional skin of DLE and normal skin. HAM56 stains the dermal macrophages. Stained cells were counted blindly;  $*p < 0.001$  by Student's *t* test; scale bars: 100  $\mu\text{m}$ .

**Table S1. Antibodies and primers used for tissue analysis.****A**

| <b><u>Primary Antibodies</u></b>                     | <b><u>Clone</u></b> | <b><u>Company</u></b>                  |
|------------------------------------------------------|---------------------|----------------------------------------|
| Rabbit Anti-Human CD3                                | 2GV6                | Ventana Medical Systems                |
| Rabbit Anti-Human CD4                                | SP35                | Ventana Medical Systems                |
| Rabbit Anti-Human CD8                                | SD37                | Ventana Medical Systems                |
| Mouse Anti-Human CD163                               | 10D6                | Leica Biosystems, Buffalo Grove, IL    |
| Rabbit Anti-Human Foxp3                              | D2W8E               | Cell Signaling Technology, Danvers, MA |
| Mouse Anti-Human Macrophage                          | HAM56               | Ventana Medical Systems                |
| Rabbit Anti-pStat3 (Tyr705)                          | D3A7                | Cell Signaling Technology, Danvers, MA |
| Tryptase                                             | AA1                 | DAKO, Santa Clara, CA                  |
| <b><u>Secondary Antibodies and staining kits</u></b> |                     |                                        |
| Goat anti-Mouse IgG, Alexa Fluor® 488 conjugate      |                     | Thermo Fisher Scientific               |
| Goat anti-Rabbit IgG, Alexa Fluor® 568 conjugate     |                     | Thermo Fisher Scientific               |
| Goat anti-Mouse IgG, Alexa Fluor® 647 conjugate      |                     | Thermo Fisher Scientific               |
| UltraView Universal DAB Detection Kit                | 760-500             | Ventana Medical Systems                |
| Omni Map anti-Rabbit - HRP                           | 760 - 4311          | Ventana Medical Systems                |
| Omni Map anti-Mouse - HRP                            | 760 - 4310          | Ventana Medical Systems                |
| Discovery Purple Kit                                 | 760 - 229           | Ventana Medical Systems                |
| Discovery DAB Kit                                    | 760 - 159           | Ventana Medical Systems                |
| <b><u>Chemical for Special Stains</u></b>            |                     |                                        |
| Toluidine Blue                                       |                     | Sigma, St. Louis, MO                   |
| Masson's trichrome                                   |                     | Sigma, St. Louis, MO                   |

**B**

| <b><u>Gene Name</u></b>       | <b><u>Forward Primer</u></b> | <b><u>Reverse Primer</u></b> |
|-------------------------------|------------------------------|------------------------------|
| <b>IL-6</b>                   | TCTTCAGTATGTCTAGCCCCTG       | AGGCGCCCAACTGTGCTAT          |
| <b>IL-10</b>                  | GCTCTTACTGACTGGCATGAG        | CGCAGCTCTAGGAGCATGTG         |
| <b>IFN<math>\gamma</math></b> | ATGAACGCTACACACTGCATC        | CCATCCTTTTGCCAGTTCCTC        |
| <b>TNF<math>\alpha</math></b> | CCCTCACACTCAGATCATCTTCT      | GCTACGACGTGGGCTACAG          |
| <b>TGF<math>\beta</math>1</b> | GCTGAACCAAGGAGACGGAAT        | CAAGAGCAGTGAGCGCTGAA         |



| <b>Taqman</b> | Prime Time Assays (Integrated DNA Technologies, Coraville, IO) |                      |
|---------------|----------------------------------------------------------------|----------------------|
|               | <b>Custom Probe</b>                                            | <b>Exon Location</b> |
| <b>IL-4</b>   | Mm.PT.28.32703659                                              | 4-5                  |
| <b>IL-17</b>  | Mm.PT.58.6531092                                               | 2-3                  |
